# Supplementary material for: Technical Note: Low Cost Mesocosms Design for Studies of Tropical Marine Environments
Source: Copernicus journal article supplement (doi:10.5194/bg-2019-56), 2019-03-15
Supplement: Supplementary file [file bg-2019-56-AC2-supplement.pdf]

22 may 2019

Prof. Jean Pierre Gattuso  
Associated Editor  
Biogeosciences

Dear professor Jean Pierre Gattuso

You will find herewith-enclosed the revised version of the manuscript entitled “Technical note: low cost mesocosms design for studies of tropical marine environments”, by Ruben R. Raygosa-Barahona, Sebastien Putzeys, Jorge Herrera-Silveira and Daniel Pech. The comments of the reviewer have been counterchecked and considered to improve the manuscript. You will find attached our reply to the points raised by the reviewer and how we have dealt with each one of them. We thank you in advance for your assistance.

Sincerely,

Ruben Raygosa-Barahona

## Low Cost Mesocosms Design for Studies of Tropical Marine Environments

Ref P1. Line 7: Mesocosms are often deployed in situ, thus are not necessarily an alternative to in situ studies.

Response: The first sentences in the summary were re written in order to avoid confusion.

Changes: *The design of mesocosms, to conduct enclosed marine experimental studies, imposes diverse challenges associated to technical facilities for maintaining the experimental condition close to natural variability. Here we present and discuss the technical improvements for a mesocosms used to study the effect of oil in the productivity of the tropical marine waters from the Gulf of Mexico*

Ref P2.L4: Is there really no tropical mesocosm experiment performed after 2013? Many subtropical experiments have been conducted under conditions that could warrant a comparison, and/or an inclusion.

Response: The last sentence of the paragraph was modified to highlight challenges imposed when using on land mesocosms in tropical environments, also we add some recently published articles . The information of table one was used now to show how the potential effect of the temperature of the enclosed water has been considered.

Changes: *Most of the on land based mesocosm facilities, located in the northern hemisphere (e.g. MESOAQUA and AQUACOSM websites) has used large artificial enclosures that includes state of the art technologies in order to obtain reliable results. The technological needs for the implementation of mesocosmos facilities for the study of tropical marine environment poses different challenge du the harsh on land environmental condition associated to high temperature and high evaporation rates. However, the control of the temperature of the enclosed water and its potential effects to bias the results has barely been considered (Carneiro et al., 2014)(Leblanc et al., 2016) (Algueró-muñiz, 2017) (Su et al., 2018)(dos Santos Severiano et al., 2018).*

.

Ref P2.26 All organisms except phytoplankton? Under which circumstances? What do you mean by “high rate of nutrient and carbon cycle”. To what processes are you referring? Please refine and rephrase.

Response: The last sentence of the paragraph was rephrased to include more detailed information about the potential effect of the temperature on phytoplankton productivity and its relationship with nutrients and carbon consumption

Changes: *The organisms that typically exhibit higher respiration rates also exhibit higher metabolism rates (Brown et al., 2004). The increment of temperature could induces an increment on the productivity of phytoplankton specific-species by accelerating the nutrient recycling in the water column (Marañon et al. 2018) but also could accelerate the phytoplankton consumption of organic carbon that might reduce the transfer of primary produced organic matter to higher tropic levels (Basu and Mackey 2018).*

Ref P5.8 Please provide a range of GoM temperature variations.

Response: The annual range of temperature variation of GoM was provided

Changes: *The surface temperature (0 – 10 m depth) of the seawater in the south of Gulf of Mexico (GoM) varies from 22 (november –february) to 28 °C (july-august), but the ambient temperature could vary from 23°C during the winter frontal storm period (november-february) to 40°C or higher during the dry season (march-may) (Angeles-Gonzales et al. 2017)*

P5.9 What do you mean by “this is the mean characteristic for using an auxiliary heating or cooling system”? Also, please fix the references.

Response: The sentence was modified to put in context the use of a cooling or heating system. The modification is now linked to the preceding sentence

Changes: *This particularity can drastically modify the seawater temperature on the mesocosmos container. To avoid this effect, the use of an auxiliary heating or cooling system is suggested.*

Ref P5.18 Confusing sentence.

Response: The sentences was modified to avoid confusion.

Changes: *Temperature tests.*

Ref P5.21 Confusing sentence.

Response: The sentences was modified to avoid confusion.

Changes:

*2.2 Temperature Tests.*

*To evaluate the variability of the temperature of the water column on the mesocosm container, a series of measurement were done with and without the effect of the electric thruster and with the mesocosmos container immersed in a water tank and out of it.*

Ref P5. How were the mesocosms immersed in water exactly? It is stated that some tests were performed with both treatments (immersed + thrusters), but the text doesn't agree with figure 6 caption. (Fig 6c or 6d is immersed?)

Response: Both the paragraph and the figure caption were rewritten clarify the text

Changes: *. At time  $t = 12:24:30$  the electric thruster is turned on at 20% of their maximum power. It was observed that the system takes approximately 1 minute to homogenize, even though the external temperature continues to increase.*

*2.2.2 Immersing the mesocosms in a tank water to increase their thermal capacity.*

*To evaluate the effect of immersing the mesocosms inside a water tank different tests were performed:*

- the mesocosms were exposed to the environment to observe the temperature variations as well as the stratification.*
- the mesocosms were immersed in water tank.*
- the effects of the thruster were included, while immersing the mesocosms in a water tank.*
- the thruster was used with different on / off cycles in.*

*As a first step the on land mesocosmos was left to evolve following the climatic conditions, Figure 6 b) shows this evolution during the day-night temperature cycle and the development of a stratification throughout the day period*

*In caption: d) effect of the thruster functioning continuously at 20% of maximum power, the stratification practically vanished.*

P6.1 "while immersing in water the mesocosms" should be "while immersing the mesocosms in water"

Response: the sentence was corrected

- Changes: *the effects of the thruster were included, while immersing the mesocosms in a water tank.*

P6.27 The accumulation of sediments is not necessarily a disadvantage. It depends on what processes or parameters you intend to measure. For example, the resuspension of normally sedimenting POM can increase the rates of attached bacterial degradation in the water column which would not have happened normally. Thus, if this is what you intend to measure, an artificially mixed tank will bias your observations, although I agree that an homogeneous tank can be appealing under other circumstances.

Response : The accumulation of sediment in our specific case is a severe disadvantage as the future goal is the simulation of a close nearshore environment (less than 2m depth). The use of the mixing system at low speed simulate the natural mixing and maintain a homogeneous water mass as it could be observed in natural conditions. Also, the beneficial effect of the mixing reduced the exposure time of the cells to high UVBR irradiances that could be measured at our latitudes.

**Changes:** *The use of marine thrusters has the additional advantage of avoiding the accumulation of sediments, which in our specific case (to test the oil exposure effect in marine productivity) is a severe disadvantage as the future goal is the simulation of a close nearshore environment (less than 2m depth). The mixing system at low speed could be used to simulate the natural mixing and maintain a homogeneous water mass as it could be observed in natural conditions.*

Section 2.3.1 Is the propeller upwelling or downwelling water through the center of the C2 BGD Interactive comment Printer-friendly version Discussion paper tank? How could that difference affect mixing and or sedimentation? (Slower centerupwelling thruster could allow some sedimentation depending of the mesocosm shape because of the downwelling on the edges.)

Response : we agree with the referee. Our mesocosms design could be easily configured for centerupwelling or centerdownwelling. Anyway all of the test presented were effectuated using the downwelling configuration because for the oil exposure experimentation the scientific staff considered that avoiding sedimentation would be appropriate for their particular experiment.

**Changes:** we add the information on discussion section :

*The direction of the propeller rotation could be easily configured for upwelling or downwelling effects by only reversing the electrical connections of the thruster. However all tests presented were effectuated using the downwelling configuration. We consider that with a high enough velocity the thruster configuration for upwelling could avoid sedimentation while at low velocities a centerdownwelling thruster could allow sedimentation.*

P7.22 & P7.28 Repetition. On many occasions, in-text citations are not properly reported or oddly inserted (too many parentheses, misplaced commas, etc). Please fix. In-text figure citation should of figures and figures labels could be improved.

Response : Comas, parenthesis, speaces, citation where fixed all along the text. Citation wer inserted using the plugging provided by the journal.

**Changes:** we replace the former P7.28 sentence with:

*In addition, CFDs can be used to estimate the profile of velocities into the mesocosms, useful to predict the stresses that the use of propellers can produce to the communities under study.*

P2.18. The sentence has no parentheses at the end. (i.e That make . . .

Response: the paragraph was rephrased and parentheses were eliminated.

**Changes:** *That make it imperative to take into account some specific considerations prior to the experimental phase*

P2.22 Temperature control is probably the primary challenge with on-land mesocosm experiments due to the thermal inertia of the aquatic environment (Leblud et al., 2014).

Response: The sentence was modified according to referee coment

Changes: *Temperature control is probably the primary challenge with on-land mesocosm experiments due to the thermal inertia of the water (Leblud et al., 2014).*

P4.23 Odd sentence

Response: Sentence was re written in order to avoid confusion

Changes: *Due to the importance of temperature in altering the rates of metabolism, it is necessary that the temperature in the mesocosms be maintained within the range in which it would be in the ecosystem to be studied*

Fig6 caption: Please consider plotting all the graphs using the same y-axis. Also revise caption and y-axis label.

Response : All graphs were re-drawn using now the same y-axis. Also the y-axis label was corrected

Changes:

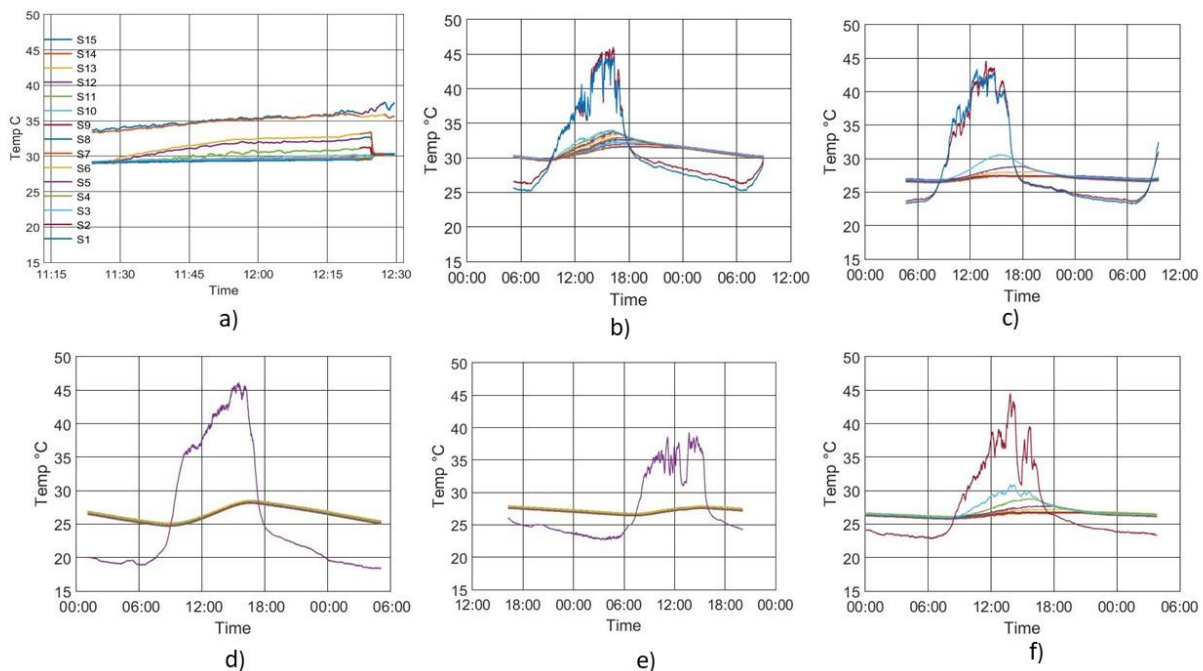

P5.33 “inmersing” should be immersing.

Response: the word was correted.

Change: *The word “immersing” was corrected in the entire text*

P6.2 Figure 6 e) appears twice

Response: The paragraph was rewritten and duplicity of “Figure 6e” was eliminated

Change: *Figure 6e shows the temperature behavior when using propellers with 5 minute on/off cycle. It can be noted that superficial layer started to heat during this short time, compared to the deeper layer. Figure 6f shows the experiment with the motor at 20 % of its maximum power with a duty cycle of 10 minutes*

P6.6. What do you define as the “instantaneous variation of maximum temperature”?

Response: we refers to a rapid increment of temperature. The sentence was re written to avoid confusion

Change: *It can be noted that the stratification had a duration of 10 hours with a rapid increase of temperature of about 3°C and a maximum change interval of 4 °C.*

P6.6-11 What is the mean temperature change under each scenario? Is stratification affected by the mesocosm immersion ?

Response: The temperature in each scenario showed a variation about 15 °C (*maximum value*) on land mesocosm without a thruster and a variation about 4 °C on the mesocosm immersed on a water tank with a thruster.

Change: Information of temperature variability was included in the discussion

*: Immersing the mesocosms in water will reduce the range of variation of the water temperature compared with the case in which the mesocosms was leaved out of the water, while has no practical effect in the stratification. The Thruster inclusion only has effect in avoiding the stratification efficiently on a tropical offshore mesocosms system while do not have a significant effect on the temperature*

P6.14 The appropriate speed to eliminate the stratification could be saved for the next section (on thruster velocity).

Response : *We have decided to leave that statement in its original place to match with the chronological order of the experiments*

# Technical Note: Low Cost Mesocosms Design for Studies of Tropical Marine Environments

Ruben R. Raygosa-Barahona<sup>1</sup>, Sebastien Putzeys<sup>1</sup>, Jorge Herrera-Silveira<sup>1</sup>, Daniel Pech<sup>2</sup>

<sup>1</sup>Cinvestav, Merida, 97600, Mexico

5 <sup>2</sup>Laboratorio de Biodiversidad Marina y Cambio Climático, Ecosur, Campeche, 24500, Mexico

*Correspondence to:* Ruben R. Raygosa-Barahona (r.raygosa@gmail.com)

**Abstract.** The design of mesocosms, to conduct enclosed marine experimental studies, imposes diverse challenges associated to technical facilities for maintaining the experimental condition close to natural variability. Here we present and discuss the technical improvements for a mesocosms used to study the effect of oil in the productivity of the tropical marine waters from the Gulf of Mexico. The mesocosm was equipped with an electric marine thruster as a means of avoiding stratification in the water contained in it. In addition, the system was submerged in a water tank to increase the thermal inertia and maintain the temperature variations within reasonable ranges. The design does not include auxiliary forcing cooling systems. The results revealed the influence of climatology on the mesocosms' temperature and showed the feasibility of the proposed design for tropical environments. With high variations of ambient temperature (>20°C, during the day), the variations in the mesocosm temperature were only 3°C. The range of temperature variations were similar to those that occur in tropical environments from the Gulf of Mexico.

## 1 Introduction

*In situ* ocean environmental studies are expensive and often difficult to perform (Reilly, 1999). On the other hand, the results of small-scale laboratory experiments are cheap, but they do not incorporate sufficient environmental realism (Cappello and Yakimov, 2010). The mesocosms studies are an intermediate alternative between both laboratories and *in situ* experiments. The ability to control environmental variables (Vallino, 2000) jointly with the replicability and repeatability compared to field studies (Cappello and Yakimov, 2010; Petersen and Hastings, 2001)(Auffan et al., 2018) convert the mesocosm into a powerful experimental option. Best of all, parts (populations) and wholes (ecosystems) can be investigated simultaneously (Odum, 1984). The terms micro-, meso- and macrocosms are often used to define multifactorial ecosystems studies. A volume classification has been suggested in which microcosms are enclosures smaller than 1 m<sup>3</sup>, mesocosms to contain between 1 to 1000 m<sup>3</sup>, and finally macrocosms to contain more than 1000 m<sup>3</sup> (Culp et al., 1988). The material and design used in these cosms constructions usually depend on the experiment's localization and the objective of the study. Enclosures with flexible walls are commonly used *in situ*, whereas containers with rigid walls are used either on shore or in indoor facilities. Mesocosms experimental approach is arguably the single most powerful method to obtain a mechanistic quantitative understanding of



ecosystem-level impacts of stressors on complex systems. Most of the on land based mesocosm facilities, located in the northern hemisphere (e.g. MESOAQUA and AQUACOSM websites) has used large artificial enclosures that includes state of the art technologies in order to obtain reliable results. The technological needs for the implementation of mesocosms facilities for the study of tropical marine environment poses different challenge due the harsh on land environmental condition associated to high temperature and high evaporation rates. However, the control of the temperature of the enclosed water and its potential effects to bias the results has barely been considered, (Carneiro et al., 2014, Leblanc et al., 2016, Algueró-muñiz, 2017, Su et al., 2018).

In the existing literature, temperature control or register was not considered a priority despite the variation of temperature in tropical areas. The differences in temperature recorded in different studies are highly variable (Table 1), probably causing the presence of a thermocline during the experiment. None of these studies has considered temperature as a relevant factor, probably due to the small impact expected on the objective of the study.

Here we designed and tested a ground mesocosms unit system developed for studies in a tropical environment where the water column temperature profile could be a relevant factor modifying the response of the productivity and metabolic activity of the micro-organisms on the water column. Additionally the atmospheric temperature could induce marked changes in the water column temperature and high rates of evaporation.

The design of a mesocosms experiment is a complex procedure in which the variables and parameters (chemical, physical or biological) have to be balanced with the objectives of the study and the development feasibility (Riebesell et al., 2013). In the case of experiments in tropical areas such as the south of the Gulf of Mexico, the greatest challenge could be the harsh environmental conditions: the high environmental temperatures (32-40 °C), the high evaporation rates, recurrence of storms and hurricanes (June to November). That make it imperative to take into account some specific considerations prior to the experimental phase. Here we describe and discuss the series of analyses and tests performed to determine the feasibility of mesocosms experiments in the tropical region of the Yucatan peninsula, México.

Metabolism is the process by which energy and mass are transformed within an organism and exchanged between the organism and its environment. Metabolic theory predicts how metabolic rate controls ecological processes (Gillooly et al., 2001) . On the other hand, temperature is a master variable that controls biological activity through its fundamental effect on metabolic rate (Gillooly et al., 1994). Temperature changes affect several physical and chemical properties of water such as conductivity, salinity, density (viscosity), oxygen solubility, pH and carbon dioxide solubility. Also, all the biological processes are temperature dependent. The organisms that typically exhibit higher respiration rates also exhibit higher metabolism rates (Brown et al., 2004). The increment of temperature could induces an increment on the productivity of phytoplankton specific-species by accelerating the nutrient recycling in the water column (Marañon et al. 2018) but also could accelerate the phytoplankton consumption of organic carbon that might reduce the transfer of primary produced organic matter to higher tropic levels (Basu and Mackey, 2018).

In a mesocosms experiment it has been observed that after a 20-25 °C threshold, the temperature generally influences respiration more than primary production (Yvon-durocher et al., 2015). Temperature also has the potential to shape the distribution and diversity of the marine microbial community. (Boyd et al., 2013; Flombaum et al., 2013; Pittera et al., 2014; Thomas et al., 2012; Yung et al., 2015) When the thermal limits are exceeded, changes in the microbial community fitness are produced, with cascading impacts on the ecosystem services (Costanza et al., 1997, 2014). Finally, the temperature also affects the toxicity of compounds such as heavy metals or ammonium (Cairns, 1975). Metabolic rates increase with temperature exponentially according to the Boltzmann-Arrhenius Function:

$$B = ae^{-E_i/kT} \quad (1)$$

10

Where  $B$  is the mass-specific metabolic rate (in units of  $\text{time}^{-1}$ ) (Marañón et al., 2018),  $k$  is the Boltzmann constant ( $8.62 \times 10^{-5} \text{ eV K}^{-1}$ ),  $T$  is the Temperature in K,  $a$  is a normalization constant and  $E_i$  is the activation energy (eV).  $E_i$  of basal metabolic rate (maintenance respiration) maintains relatively similar values (0.6–0.7 eV) across all organisms from microbes to plants and animals (Brown et al., 2004)(López-Sandoval et al., 2010). For each taxon,  $B/a=B_o$  is approximately independent of  $a$ ; then almost all the effects on temperature variations are contained in the normalization term  $B_o$  (Marañón et al., 2018).

15

$$B_o = e^{-E_i/kT} \quad (2)$$

The value of  $B$  at some temperature  $T$  could be related to its value at some other temperature  $T_o$  by

$$\frac{B(T)}{B(T_o)} = \frac{B_o(T)}{B_o(T_o)} = e^{E_i(T-T_o)/kTT_o} \quad (3)$$

20

Equation (3) states that the changes in metabolic rates  $B$ , caused by a temperature variation depends on both: the amount of temperature variation ( $T-T_o$ ) and on the initial temperature  $T_o$ . Figure (1) shows the variation of the normalized metabolic rate,  $(B(T)/B(T_o))$  with respect to the temperature starting from several initial temperatures ( $T_o$ ). For lower  $T_o$ , similar increments of temperature produce greater variations in the growth rate than higher  $T_o$  temperatures. For a given  $T_o=20^\circ \text{C}$ , a temperature increase of  $3^\circ \text{C}$  will produce a variation in the growth rate of 30% while for a  $T_o=25^\circ \text{C}$  a similar increment of temperature will produce a variation in the growth rate of 25%. This example shows that in a mesocosms it is very important to keep temperature variations controlled in at least the temperature ranges that occur in the environmental conditions of the site where the samples to be studied are to be taken. Probably the temperature control is the primary challenge with on-land mesocosm experiments due to the thermal inertia of the water (Leblud et al., 2014). For example, to maintain a constant temperature of  $15^\circ \text{C}$  in mesocosms of 2500 liters of saline water ( $\sim 36 \text{ PSU}$ ), it is necessary to apply an energy of approximately  $10^{-6} \text{ J}$  for each  $^\circ \text{C}$  above the environmental temperature. The energy could be applied using a

30

resistive heater controller that heats the water column when necessary. In the opposite case, when the water column needs to be cooled, as in our case the situation turns on several difficulties.

The efficiency of any refrigerant system depends, among other things, on the coolant used, the thermal insulation between the medium and the surrounding environment and of course the refrigerant system used (Fleming, 2015). Besides, the design and selection of any refrigeration system is a tradeoff between the system cost, energy cost and facilities capacity available, the volume of the substance to be cooled and the power applied to bring the water to the desired temperature below the ambient temperature during the time of the study.

Whichever the case is, heating or cooling, the effect of the temperature on the entire volume is not instantaneous. During the heating or cooling process, a thermocline can appear, causing an alteration and forming micro-conditions that can alter the response of the biological communities during the experiment. The way to prevent stratification and to ensure a more efficient heat transfer to the entire water column is by using a circulation system. Traditionally pumps (centrifugal or peripheral) used in circulation systems need to accelerate the liquid at relatively high speeds using high differential pressure levels. In mesocosms systems the high velocities could promote a stress on the communities or modification due to the destruction of the more delicate cells, affecting the experimental conditions. The alternative, that we propose, is to use a marine thruster device individually located in each mesocosms unit. The thruster propeller can rotate at speeds much lower than the impellers of the water pumps. For example, a water pump rotates typically at 1800 rpm while a marine thruster works at speeds of 700 rpm at maximum velocity.

Whatever the method used to promote the water motion inside the cosms it is necessary to know the profile of water velocities in order to assess the potential stress or damage to marine communities under study. Although instruments exist to measure velocity profiles in the aquatic environment, such as Aquadopp profiler from Nortek or ADP from Sontek, their capacity exceeds what is needed in a mesocosm (Nortek, 2010). As an alternative, a computer simulation using Computational Fluid Dynamics software (CFD) can be employed. CFD software is commonly used in mechatronic design which involves marine thrusters (Maciel, P., Koop, A. and Vaz, 2013).

Here we show and discuss the importance of including a profile of velocities measurements on a ground mesocosms using a CFD to make spot measurements of speed prior to experiments. It is also proposed to measure the temperature along the water column of the mesocosm subject to various internal and external conditions to verify how they affect the variations throughout the day of the environmental conditions within the mesocosms.

## **2 Design and Performance Evaluation.**

### **2.1 Mesocosm Design.**

Due to the importance of temperature in altering the rates of metabolism, it is necessary that the temperature in the mesocosms be maintained within the range in which it would be in the ecosystem to be studied. In order to determine the appropriate seawater temperature range, the results of sampling in two places are presented below.

The site of study was Telchac Beach (21°20'25.02" N 89°18'25.56" W), marked with a black dot on the map, figure 2.

The data collection was performed with a YSI probe . Figure 3 presents a record of the temperatures over 2 days during the month of May 2016 of seawater in Telchac Harbor in the Gulf of Mexico. The probe was installed at a depth of 1.5 m while the ambient temperature was recorded with a Vaisala wxt520 Meteorological Station. In these graphs, it can be seen that water temperature variations occurred in synchrony with variations in air temperature. The variations are of the order of 4 °C. Therefore it is reasonable to consider that a temperature variation in a mesocosm for these tropical conditions should not exceed these limits.

By contrast in figure 5 the temperature record taken at a distance of 10 kms to the north at 9 m depth over a week shows that the variations in seawater temperature are not necessarily in sync with the ambient temperature and fluctuations over a day are not greater than 1 °C.

In the previous examples, the sampling points are located less than 10 km away from each other. Important variations in the behavior of the temperature are shown, despite its proximity. However other conditions such as depth, currents and seasonal variations can produce significant changes in sea temperature. The variation in magnitude of these variables must be taken into account to verify that the mesocosm presents conditions similar to those of the place of study.

The surface temperature (0 – 10 m depth) of the seawater in the south of Gulf of Mexico (GoM) varies from 22 (november – february) to 28 °C (july-august), but the ambient temperature could vary from 23°C during the winter frontal storm period (november-february) to 40°C or higher during the dry season (march-may) (Ángeles-gonzález, 2017). This particularity can drastically modify the seawater temperature on the mesocosms container. To avoid this effect, the use of an auxiliary heating or cooling system is suggested. The containers used for the ground mesocosms prototype are commercial water tanks made of high-density polyethylene. The container shape is a cylinder 1.75 m high by 1.55 m in diameter, see Figure 5. A commercial brushed NEREAUS marine electric thruster of ½ hp composes the recirculating system. The thruster's velocity is driven by a PWM motor controller controlled either by a microcontroller or manually by a potentiometer adjustable by the user. Note in Figure 5 the temperature column sensor located on the left side. Additionally, the system has a radio link to be able to monitor the data in real time.

## **2.2 Temperature Tests.**

To evaluate the variability of the temperature of the water column on the mesocosm container, a series of measurement were done with and without the effect of the electric thruster and with the mesocosmos container immersed in a tank of water and out of it.

### **2.2.1 Temperature Profiler Tests.**

To evaluate the performance of the electric thruster to avoid water stratification in the mesocosmos container, an artificial temperature gradient using two heaters of 2000 W each was created. The heaters were placed 30 cm below the surface for one hour, and 15 temperature sensors were installed vertically aligned along the water column. One of the sensors was installed just above the water level and the second on was installed 30 cm above to measure the ambient temperature. The electric marine thruster was then power on at 25% of its maximum power. Figure 6a) shows the temporal evolution of the temperature

in the container throughout the experiment. From now on for the following figures, S1 to S15 labels and their respective color stand for each one of the signal fetched for 15 temperature sensor installed into the container. The sensors 1 to 13 are submerged in the water in an order according to their number from the deepest to the surface. The sensors 14 and 15, in blue and brown respectively are above the water level. At time  $t = 12:24:30$  the electric thruster is turned on at 20% of their maximum power.

5 It was observed that the system takes approximately 1 minute to homogenize, even though the external temperature continues to increase.

#### 2.2.2 Immersing the mesocosms in a water tank to increase their thermal capacity.

To evaluate the effect of immersing the mesocosms inside a water tank different tests were performed:

- the mesocosms were exposed to the environment to observe the temperature variations as well as the stratification.
- 10 • the mesocosms were immersed in water tank.
- the effects of the thruster were included, while immersing the mesocosms in a water tank.
- the thruster was used with different on / off cycles in.

As a first step the on land mesocosmos was left to evolve following the climatic conditions, Figure 6b) shows this evolution during the day-night temperature cycle and the development of a stratification throughout the day period. The registered temperature on all sensors converges until a minimum temperature of 30°C. Notice that the ambient temperature goes from 25 °C to 45 °C. It can be noted that the stratification had a duration of 10 hours with a rapid increase of temperature of about 3°C and a maximum change interval of 4 °C.

The test was repeated with the mesocosm immersed in water tank. Figure 6c) shows as expected, the formation of a stratification. However, the variation of temperature was reduced. It can be shown that even though the variations in environmental temperature were similar to those in the previous experiment, the temperature variation in the water column is lower with a maximum of 2.5°C.

#### 2.2.3 Including the Electric Marine Thruster

Once the presence of water temperature stratification was detected, the next step was to include an electric marine thruster to eliminate the presence of water stratification. The continuous functioning of the marine thruster at 20% of its maximum power was sufficient to eliminate the water stratification effect (Fig 6d). No water stratification occurred and the change in temperature over a night-day cycle was 4 °C contrasting with the 25 °C of environmental temperature variation.

A disadvantage of brushed motors such as those used in certain electric thrusters is the wear of some of their internal components related to the use. This feature suggests interleaving on/off cycles. Figure 6e shows the temperature behavior when using propellers with 5 minute on/off cycle. It can be noted that superficial layer started to heat during this short time, compared to the deeper layer. Figure 6f shows the experiment with the motor at 20 % of its maximum power with a duty cycle of 10 minutes. There are small undulations along the lines of temperature produced by the effect of the motor. Comparing with the previous case, it is concluded that a 50% duty cycle with a period of 5 minutes of ignition for 5 minutes of shutdown almost produces the same effect as using the motor continuously. In the case of prolonged periods of test, this procedure can

significantly extend the life of the motor brushes. On the other hand, the use of a work cycle of 10 minutes presented stratification and therefore its use is not recommended.

### **2.3 Water Velocities Profiles Produced by the Thruster.**

The use of marine thrusters has the additional advantage of avoiding the accumulation of sediments, which in our specific case (to test the oil exposure effect in marine productivity) is a severe disadvantage as the future goal is the simulation of a close nearshore environment (less than 2m depth). The mixing system at low speed could be used to simulate the natural mixing and maintain a homogeneous water mass as it could be observed in natural conditions.

The velocity of the electrical thruster can be easily controlled and could be varied over a wide range of speeds including low, by controlling the current that feeds them (Bishop, 2006). A computer numerical simulation using the CFD software Solidworks © shows the velocities profile and flow of a virtual liquid (water) at speeds of rotation of a propeller of less than 100 rpm (Figure 7). Results from the simulation show regions with maximum velocities in the center of the mesocosms ( $0.5 \text{ m s}^{-1}$ ) while lower speeds occur at the edge ( $0.15 \text{ m s}^{-1}$ ). The mathematical model of a thruster can consist of more than 40 parameters and is extremely nonlinear (Bachmayer et al., 2000). That is, a small variation in some parameter could produce a very different result. Therefore, we verify the velocities using a spot measure and compare them with those obtained by the CFD.

#### **2.3.1 Water Velocity against power supplied.**

To measure the speed, a propeller-based flow meter was placed at approximately 15 centimeters from the center of the thruster propeller and subsequently moved to the edge of the mesocosms. In Figure 8, maximum power (100%) corresponds to  $\frac{1}{2}$  hp, while the velocity was in  $\text{m s}^{-1}$ . Vel1 stand for the velocity in the center of the mesocosms while vel2 stand for the velocity at the edge. The power was incremented in steps of 10% of the maximum power. It can be observed that at a power greater than 50% there is no significant increase in the water speed, although more turbulence was observed. On the other hand, the values obtained with the CFD in the center and the edge of the mesocosm,  $0.5$  and  $0.15 \text{ m s}^{-1}$  correspond to the values obtained by direct measurement of  $0.5$  and  $0.125 \text{ m s}^{-1}$  respectively.

### **3 Discussions and Conclusions**

No literature describing the use of electric propellers in mesocosms was found for tropical on land mesocosms. Without the use of a thruster, a significant temperature difference appears between superficial and bottom layers during a 24h period. This temperature difference could promote micro-conditions (Nada Krstulovic, et al 1995) that would alter biological communities' responses during an experiment, mainly when performed on bacterioplankton and phytoplankton (Lorena Grubisic et al 2012). Immersing the mesocosms in a water tank will reduce the range of variation of the water temperature compared with the case in which the mesocosms was leaved out of the water, while has no practical effect in the stratification. The inclusion of the thruster only has effect to avoiding stratification efficiently on a tropical on land mesocosms system while do not have a significant effect on the temperature. Additionally, its inclusion in the mesocosms design can be useful to reduce the stress of marine communities under study compared to using water recirculation systems.

The direction of the propeller rotation could be easily configured for upwelling or downwelling effects by only reversing the electrical connections of the thruster. However all tests presented here were effectuated using the downwelling configuration. We consider that with a high enough velocity the thruster configuration for upwelling could avoid sedimentation while at low velocities a centerdownwelling thruster could allow sedimentation.

- 5 The different tests carried out compared to the *in situ* data suggest the variability inside the mesocosms container could be considered as part of the natural daily changes.

In addition, CFDs can be used to estimate the profile of velocities into the mesocosms, useful to predict the stresses that the use of propellers can produce to the communities under study.

- 10 The different tests have been carried out under no controlled environmental conditions, Surprisingly, environmental variations of up to 25 °C of temperature resulted in only 3 °C of temperature variation in the mesocosms. The authors consider that this variability compared to the *in situ* data suggest the variability inside the tank could be considered as part of the natural daily changes in the environment.

- 15 The immersion of the mesocosm unit in the water tank together with the use of a marine thruster shows its efficiency to maintain water temperature relatively stable without the need to add auxiliary refrigeration equipment. This is a lower cost strategy. During the preparation of the different tests, a decrease in water level due to evaporation was observed, averaging 6 mm per day. This reduction in level represents approximately 6 liters of water per day. This variation can produce important changes in some physical parameters such as salinity. Future work may be to implement a system for measuring evaporation. The series of tests performed allow us to conclude that in the case of onshore mesocosms experiments in tropical areas, auxiliary and highly costly refrigeration equipment is not necessary. This allows both lower installation and running costs.

## 20 **Acknowledgements**

Thanks to our colleagues from the ISMER-UQAR, specially to Gustavo Ferreyra for share it experiences with the implementation of on land mesocosms. And to Ismael Mariñp Tapia for share records from sea temperatures in Telchac Beach.

- 25 This work was part of the binational collaboration México-Quebec project “Desarrollo de experimentos en mesocosmos para evaluar la vulnerabilidad de los ecosistema marinos ocasionada por la actividad petrolera: comparación latitudinal” FONCICyT 265435. Financial support was also provided by the SENER2012-1-Hidrocarburos (Sectorial Research Funds 0020SRE-CONACYT S0018) from the Mexican Council of Science and Technology (ConaCyt), the Mexican Secretary of Energy (SENER) and the Mexican Petroleum Company (PEMEX).

30

Algueró-muñiz, M.: Ocean acidification effects on mesozooplankton community development : Results from a long-term mesocosm experiment, , 12(4), 1–29, 2017.

Ángeles-gonzález, L. E.: Molluscan Studies, J. Molluscan Stud., 83(September 2018), 280–288, doi:10.1093/mollus/eyx013, 2017.

- Auffan, M., Masion, A., Mouneyrac, C., de Garidel Thoron, C., Hendren, C. O., Thiery, A., Santaella, C., Giamberini, L., Bottero, J.-Y., Wiesner, M. R. and Rose, J.: Contribution of mesocosm testing to a single-step and exposure-driven environmental risk assessment of engineered nanomaterials, *NanoImpact*, 13(December 2018), 66–69, doi:10.1016/j.impact.2018.12.005, 2018.
- 5 Bachmayer, R., Whitcomb, L. L. and Grosenbaugh, M. a: An Accurate Four-Quadrant Nonlinear Dynamical Model for Marine Thrusters : Theory and Experimental Validation, *IEEE J. Ocean. Eng.*, 25(1), 146–159, doi:10.1109/48.820747, 2000.
- Basu, S. and Mackey, K. R. M.: Phytoplankton as Key Mediators of the Biological Carbon Pump : Their Responses to a Changing Climate, *Sustainability*, 10(3), 869, doi:10.3390/su10030869, 2018.
- Bishop, R. H.: *Mechatronics : an introduction*, Taylor & Francis., 2006.
- 10 Boyd, P. W., Rynearson, T. A., Armstrong, E. A., Fu, F., Hayashi, K., Hu, Z., Hutchins, D. A., Kudela, R. M., Litchman, E., Mulholland, M. R., Passow, U., Strzepek, R. F., Whittaker, K. A., Yu, E. and Thomas, M. K.: Marine Phytoplankton Temperature versus Growth Responses from Polar to Tropical Waters - Outcome of a Scientific Community-Wide Study, *PLoS One*, doi:10.1371/journal.pone.0063091, 2013.
- Brown, J. H., Gillooly, J. F., Allen, A. P., Savage, V. M. and West, G. B.: Toward a metabolic theory of ecology, *Ecology*, 15 85(7), 1771–1789, doi:Doi 10.1890/03-9000, 2004.
- Cairns, J.: The Effects of Temperature Upon the Toxicity of Chemicals to Aquatic Organisms, , 47(1), 135–171, 1975.
- Cappello, S. and Yakimov, M. M.: Mesocosms for Oil Spill Simulation, in *Handbook of Hydrocarbon and Lipid Microbiology.*, 2010.
- Carneiro, L. S., Caliman, A., Guariento, R. D., Rocha, A. de M., Quesado, L. B., Fonte, E. da S., Santangelo, J. M., Leal, J. J.
- 20 F., Lopes, P. M., Meirelles-Pereira, F., Esteves, F. de A. and Bozelli, R. L.: Effects of food web structure and resource subsidies on the patterns and mechanisms of temporal coherence in a tropical coastal lagoon: an experimental mesocosm approach, *Acta Limnol. Bras.*, 25(3), 315–325, doi:10.1590/s2179-975x2013000300010, 2014.
- Costanza, R., D’Arge, R., De Groot, R., Farber, S., Grasso, M., Hannon, B., Limburg, K., Naeem, S., O’Neill, R. V., Paruelo, J., Raskin, R. G., Sutton, P. and Van Den Belt, M.: The value of the world’s ecosystem services and natural capital, *Nature*, 25 doi:10.1038/387253a0, 1997.
- Costanza, R., de Groot, R., Sutton, P., van der Ploeg, S., Anderson, S. J., Kubiszewski, I., Farber, S. and Turner, R. K.: Changes in the global value of ecosystem services, *Glob. Environ. Chang.*, doi:10.1016/j.gloenvcha.2014.04.002, 2014.
- Culp, J. M., Alexander, A. C. and Brua, R. B.: Mesocosm studies, in *Hydrobiologia*, vol. 159, pp. 221–222., 1988.
- Fleming, J. S.: The energy efficiency of refrigerants: An assessment based on thermophysical properties, *Int. J. Refrig.*, 58, 30 235–242, doi:10.1016/j.ijrefrig.2015.06.013, 2015.
- Flombaum, P., Gallegos, J. L., Gordillo, R. A., Rincon, J., Zabala, L. L., Jiao, N., Karl, D. M., Li, W. K. W., Lomas, M. W., Veneziano, D., Vera, C. S., Vrugt, J. A. and Martiny, A. C.: Present and future global distributions of the marine Cyanobacteria *Prochlorococcus* and *Synechococcus*, *Proc. Natl. Acad. Sci.*, doi:10.1073/pnas.1307701110, 2013.
- Gillooly, J., Brown, J., West, G., Savage, V. and Charnov, E.: Effects of size and temperature on metabolic rate, *Sci. Theor.*



- Pop. Biol. Conserv. Biol. For. Ecol. Manag. Mol. Ecol. Notes, 2631(1), 1–6, doi:10.1126/science.1061967, 1994.
- Gillooly, J. F., Brown, J. H. and West, G. B.: Effects of Size and Temperature on Metabolic Rate, , 293(September), 1–6, 2001.
- Leblanc, K., Cornet, V., Caffin, M., Rodier, M., Desnues, A., Berthelot, H., Turk-Kubo, K. and Heliou, J.: Phytoplankton  
 5 community structure in the VAHINE mesocosm experiment, Biogeosciences, 13(18), 5205–5219, doi:10.5194/bg-13-5205-2016, 2016.
- Leblud, J., Moulin, L., Batigny, A., Dubois, P. and Grosjean, P.: Technical Note: Artificial coral reef mesocosms for ocean acidification investigations, Biogeosciences Discuss., 11(11), 15463–15505, doi:10.5194/bgd-11-15463-2014, 2014.
- López-Sandoval, D. C., Marañón, E., Fernández, A., González, J., Gasol, J. M., Lekunberri, I., Varela, M., Calvo-Díaz, A.,  
 10 Morán, X. A. G., Álvarez-Salgado, X. A. and Figueiras, F. G.: Particulate and dissolved primary production by contrasting phytoplankton assemblages during mesocosm experiments in the Ría de Vigo (NW Spain), J. Plankton Res., 32(9), 1231–1240, doi:10.1093/plankt/fbq045, 2010.
- Maciel, P., Koop, A. and Vaz, G.: Modelling Thruster-Hull Interaction with CFD, OMAE ASME 32nd Int. Conf. Ocean. Offshore Arct. Eng., 2013.
- 15 Marañón, E., Lorenzo, M. P., Cermeño, P. and Mouriño-Carballido, B.: Nutrient limitation suppresses the temperature dependence of phytoplankton metabolic rates, ISME J., 1–10, doi:10.1038/s41396-018-0105-1, 2018.
- Nortek: Aquadopp Profiler User Manual, [online] Available from: <http://www.nortek-as.com/en/support/manuals>, 2010.
- Odum, E. P.: The Mesocosm, Bioscience, 34(9), 558–562, doi:10.2307/1309598, 1984.
- Petersen, J. E. and Hastings, A.: Dimensional Approaches to Scaling Experimental Ecosystems: Designing Mousetraps to  
 20 Catch Elephants, Am. Nat., 157(3), 324–333, doi:10.1086/319197, 2001.
- Pittera, J., Humily, F., Thorel, M., Grulois, D., Garczarek, L. and Six, C.: Connecting thermal physiology and latitudinal niche partitioning in marine *Synechococcus*, ISME J., doi:10.1038/ismej.2013.228, 2014.
- Reilly, T. J.: The Use of Mesocosms in Marine Oil Spill - Ecological Research and Development., Pure Appl. Chem., 71(1), 153–160, doi:10.1351/pac199971010153, 1999.
- 25 dos Santos Severiano, J., dos Santos Almeida-Melo, V. L., Bittencourt-Oliveira, M. do C., Chia, M. A. and do Nascimento Moura, A.: Effects of increased zooplankton biomass on phytoplankton and cyanotoxins: A tropical mesocosm study, Harmful Algae, 71, 10–18, doi:10.1016/j.hal.2017.11.003, 2018.
- Su, B., Pahlow, M. and Prowe, A. E. F.: The role of microzooplankton trophic interactions in modelling a suite of mesocosm ecosystems, Ecol. Modell., 368, 169–179, doi:10.1016/j.ecolmodel.2017.11.013, 2018.
- 30 Thomas, M. K., Kremer, C. T., Klausmeier, C. A. and Litchman, E.: A global pattern of thermal adaptation in marine phytoplankton, Science (80-. ), doi:10.1126/science.1224836, 2012.
- Vallino, J. J.: Improving marine ecosystem models: Use of data assimilation and mesocosm experiments, J. Mar. Res., 58(1), 117–164, doi:10.1357/002224000321511223, 2000.
- Yung, C. M., Vereen, M. K., Herbert, A., Davis, K. M., Yang, J., Kantorowska, A., Ward, C. S., Wernegreen, J. J., Johnson,

Z. I. and Hunt, D. E.: Thermally adaptive tradeoffs in closely related marine bacterial strains, *Environ. Microbiol.*, doi:10.1111/1462-2920.12714, 2015.

Yvon-durocher, G., Allen, A. P., Cellamare, M., Dossena, M., Gaston, J., Leitao, M., Montoya, J. M., Reuman, D. C. and Woodward, G.: Five Years of Experimental Warming Increases the Biodiversity and Productivity of Phytoplankton, , 1–22,

5 doi:10.1371/journal.pbio.1002324, 2015.

| Water type | Objective(s) under study                                                              | Temperature regulation | Temperature sampling | Sampling frequency         | Temperature variation | Reference                             |
|------------|---------------------------------------------------------------------------------------|------------------------|----------------------|----------------------------|-----------------------|---------------------------------------|
| freshwater | Fish-phytoplankton                                                                    | None – <i>in situ</i>  | No                   | -                          | No referenced         | Do Rêgo Monteiro Starling, 1993       |
| brackish   | Hydrocarbon impact on bacteria and phytoplankton                                      | None – <i>in situ</i>  | Yes                  | -                          | 30.2+-0.4°C           | Nayar <i>et al.</i> , 2005            |
| freshwater | Predator - prey                                                                       | None – <i>in situ</i>  | yes                  | 3 times during the 16 days | 25.6-29.8°C           | Maioli Castilho-Noll and Arcifa, 2007 |
| brackish   | Predator – prey                                                                       | None – <i>in situ</i>  | yes                  | 2 times per day            | 22-28°C               | Humphries <i>et al.</i> , 2011        |
| freshwater | Species loss influence on community structure and ecosystem multifunctionality        | None – <i>in situ</i>  | No                   | -                          | No referenced         | Pendleton <i>et al.</i> , 2014        |
| freshwater | Foodweb configuration and nutrient sources influence on the limnological variables    | None – <i>in situ</i>  | No                   | -                          | No referenced         | Carneiro <i>et al.</i> , 2014         |
| seawater   | Transfer of diazotroph-derived nitrogen in the food web.                              | None - <i>in situ</i>  | No                   | Once per day               | No referenced         | Leblanc et al., 2016                  |
| seawater   | plankton responses to predicted end-of-century <i>pCO</i> levels                      | None - <i>in situ</i>  | No                   | once every 8 days          | No referenced         | Algueró_Muñiz., 2017                  |
| seawater   | plankton ecosystem model                                                              | None - <i>in situ</i>  | No                   | Once per day               | No referenced         | Su et al., 2018                       |
| freshwater | influence of increased zooplankton biomass on phytoplankton community and cyanotoxins | None - <i>in situ</i>  | No                   | Every two days             | No referenced         | dos Santos Severiano et al., 2018     |

Table 1. Experimental conditions and temperature environmental control in literature of tropical mesocosms.

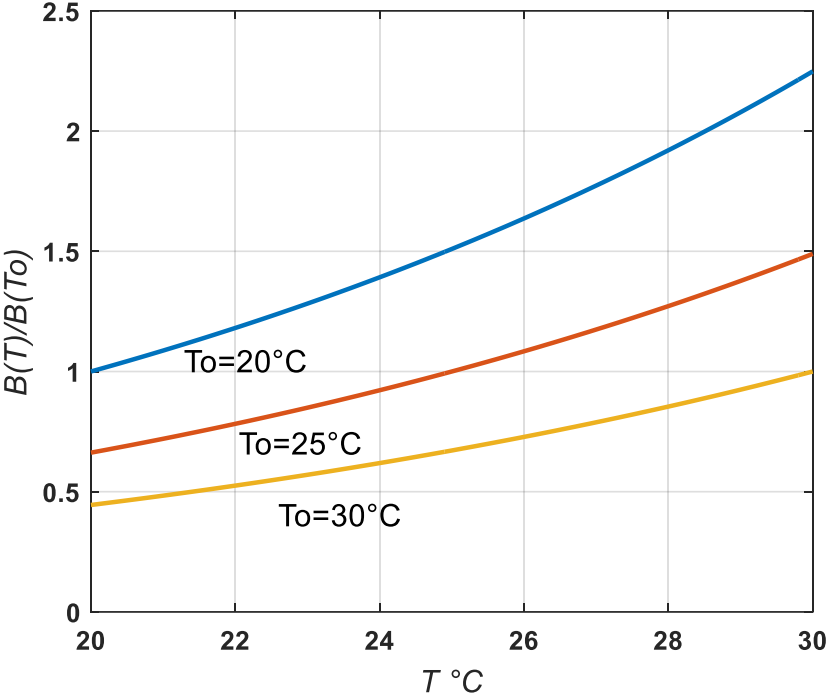

Figure 1. Variation of the normalized metabolic rate,  $(B(T)/B(T_o))$  with respect to the temperature starting from several initial temperatures ( $T_o$ ).

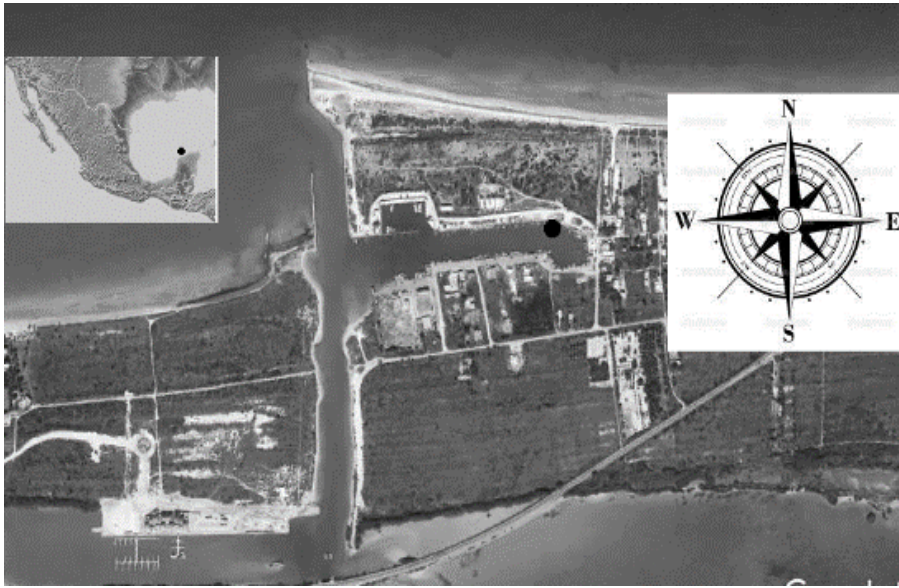

15 **Figure 2 Geographical localization of Telchac Harbor ( $21^{\circ}20'25.02''$  N  $89^{\circ}18'25.56''$  W).**

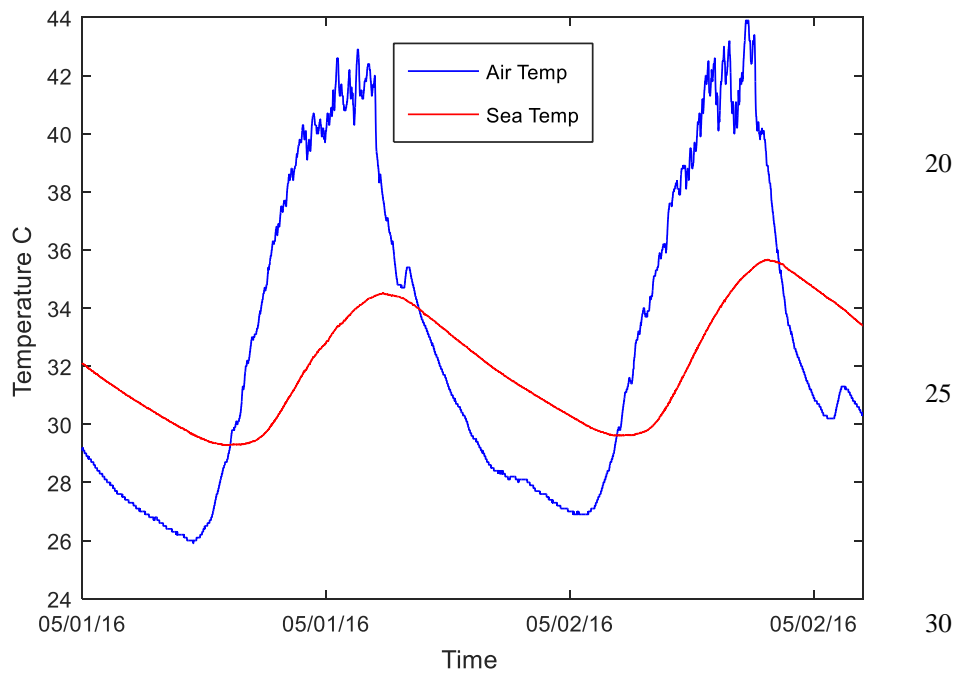

**Figure 3 Variations of sea and air temperatures in Telchac Harbor during two typical days in May 2018.**

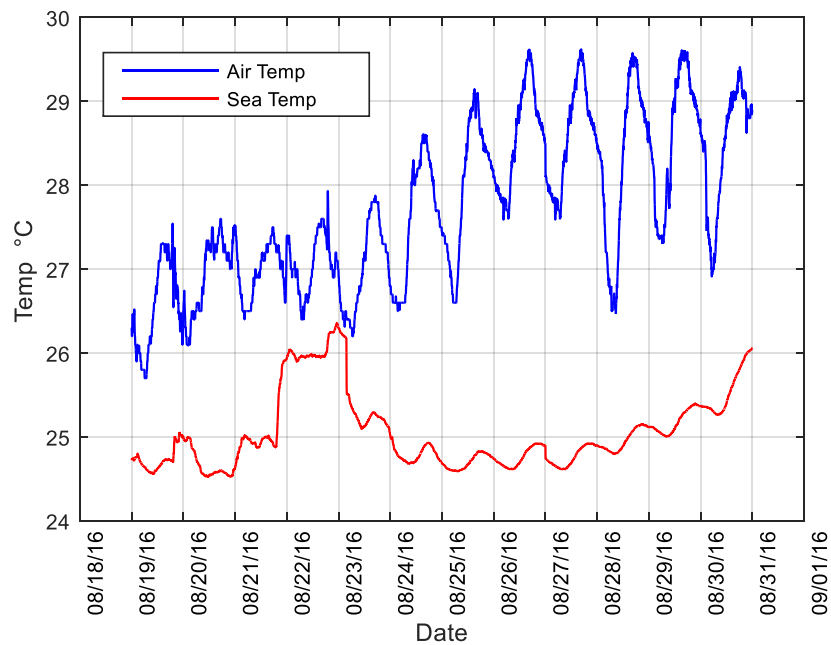

**Fig 4. Sea temperature variations registered at 9 m depth during August 2016.**

5

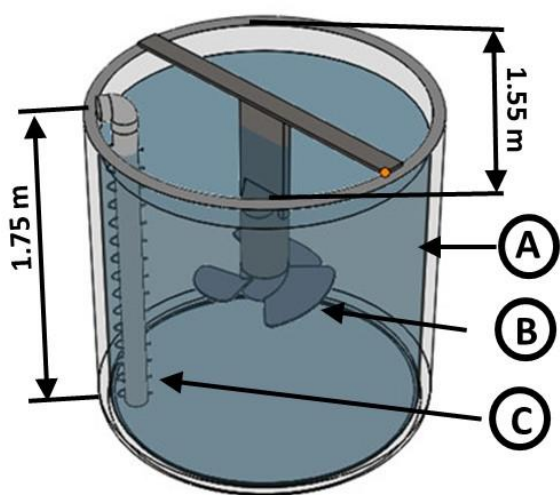

Fig. 5 mesocosm schematic design: A) container, B) propeller, C) temperature sensors.

5

10

15

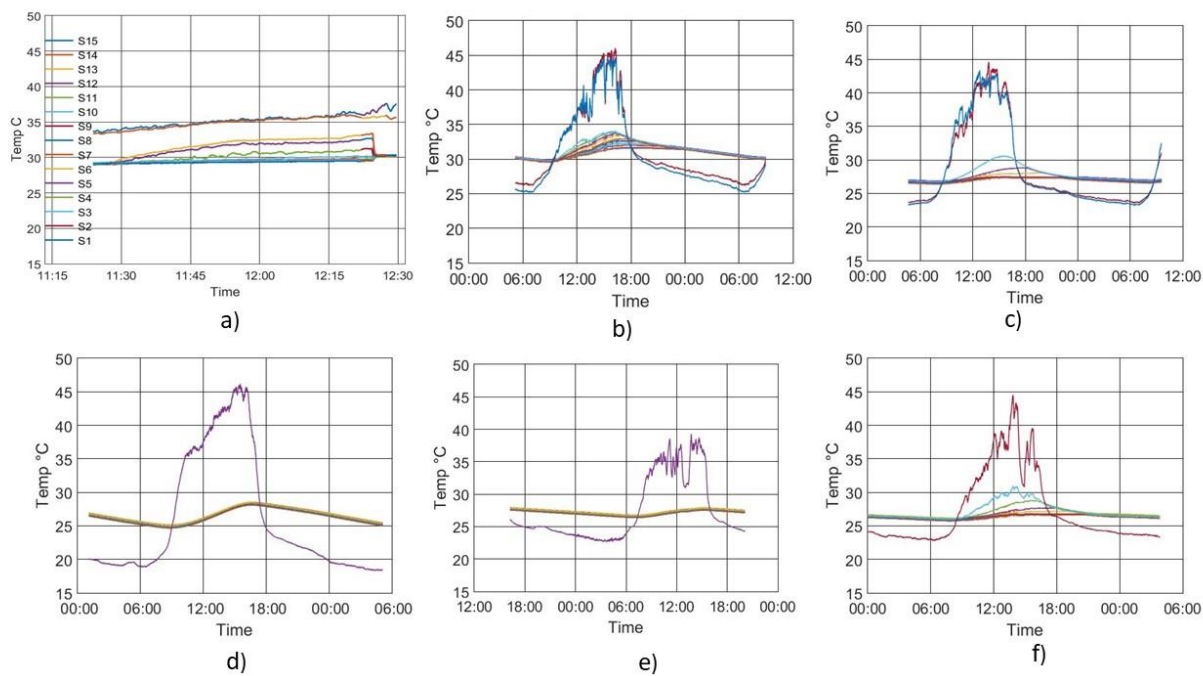

**Fig.6** evolution of the temperature in the container throughout the experiment. a) An artificial temperature gradient was created using two heaters during along 2 hours. S1 to S15 stand for each one of 15 temperature sensor installed into the container submerged in the water in an order according to their number from the deepest to the surface. The sensors 14 and 15, in blue and brow respectively are above the water level. At 12:24:30 the thruster was turned on producing the stratification to vanish. b) the system was left to evolve following the climatic conditions .The stratification process had a duration of about 10 hours with an rapid variation of the maximum temperature of 3 °C and a maximum change interval of 4 °C. c) the variations in temperature when mesocosms are immersed in water. Variation in the water column on mesocosm was approximately 2.5 °C. d) effect of the thruster functioning continuously at 20% of maximum power, the stratification practically vanished e) effect of the thruster, functioning with 5 min. power cycles. f). Effect of the marine thruster, functioning with 10 min. Power cycles. There are small undulations along the lines of temperature produced by the thruster operation.

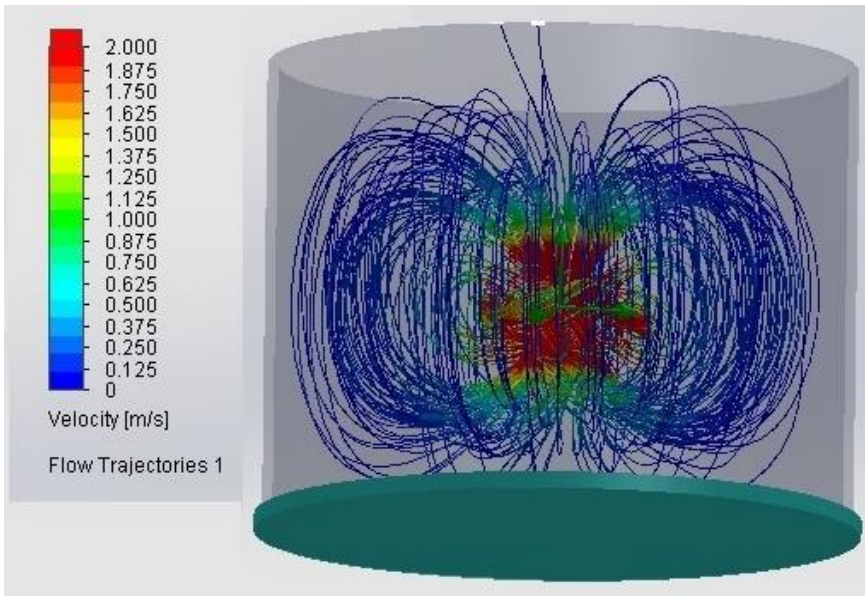

**Figure. 7** the flow of a virtual liquid obtained using SolidWorks © a CFD software.

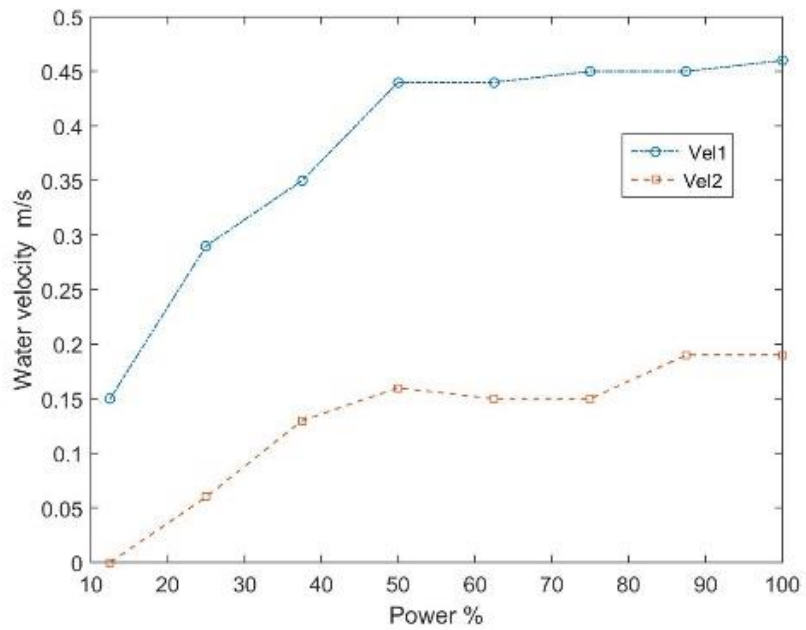

**Figure 8. Truster Power vs. water velocity.**
